# Supplementary material for: Assessment of Diagnostic Accuracy and Measurement Reliability of Low-keV Virtual Monoenergetic Dual-energy CT in The Liver Metastases of Colorectal Cancer: A Prospective, Imaging-Reference Study
Source: Research Square preprint supplement (doi:10.21203/rs.3.rs-8359303/v1), 2025-12-22
Supplement: Supplementary file 1 [file 9687600eff044e4abfa05392.docx]

**Supplementary Table S1** Comparison of standard linearly-blended (M_0.6) image series, four VMI series and combined approach (VMI 40–70) in the performance in the diagnosis of liver metastases from CRC.

|  | AUC | maximal Youden index | sensitivity | specificity |
| --- | --- | --- | --- | --- |
| Mean attenuation |  |  |  |  |
| M_0.6 | 0.955 | 0.843 | 86.9% | 93.4% |
| VMI 40 | 0.966 | 0.829 | 90.0% | 92.9% |
| VMI 50 | 0.959 | 0.836 | 86.2% | 97.4% |
| VMI 60 | 0.962 | 0.811 | 86.9% | 94.2% |
| VMI 70 | 0.958 | 0.798 | 90.8% | 89.0% |
| *p* value | ﹥0.05 |  |  |  |
| Combined | 0.969 | 0.859 | 88.5% | 97.4% |
| SNR |  |  |  |  |
| M_0.6 | 0.893 | 0.632 | 72.3% | 90.9% |
| VMI 40 | 0.974 | 0.873 | 89.2% | 98.1% |
| VMI 50 | 0.958 | 0.811 | 86.9% | 94.2% |
| VMI 60 | 0.939 | 0.743 | 80.8% | 93.5% |
| VMI 70 | 0.914 | 0.685 | 80.8% | 87.7% |
| *p* value | ﹤0.01 |  |  |  |
| Combined | 0.987 | 0.893 | 93.8% | 95.5% |

CRC, colorectal cancer.
